# Supplementary material for: High permeability and salt rejection reverse osmosis by a zeolite nano-membrane
Source: Royal Society of Chemistry journal article supplement (doi:10.1039/c3cp43854f), 2013-01-01
Supplement: c3cp43854f.pdf [file c3cp43854f.pdf]

Supplementary figures

The relation between pressure drop and compressive distance of left piston for FAU zeolite and MFI zeolite with different thickness is given in Figure 1.

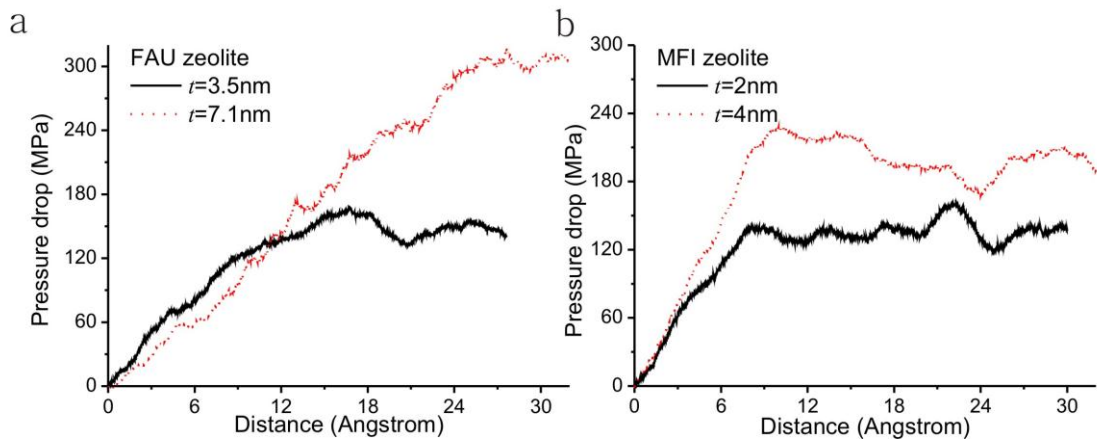

Figure 1 The pressure drop for FAU zeolite (a) and MFI zeolite (b).

The number of sodium ion during compression of left piston for FAU zeolite and MFI zeolite with different thickness is given in Figure 2.

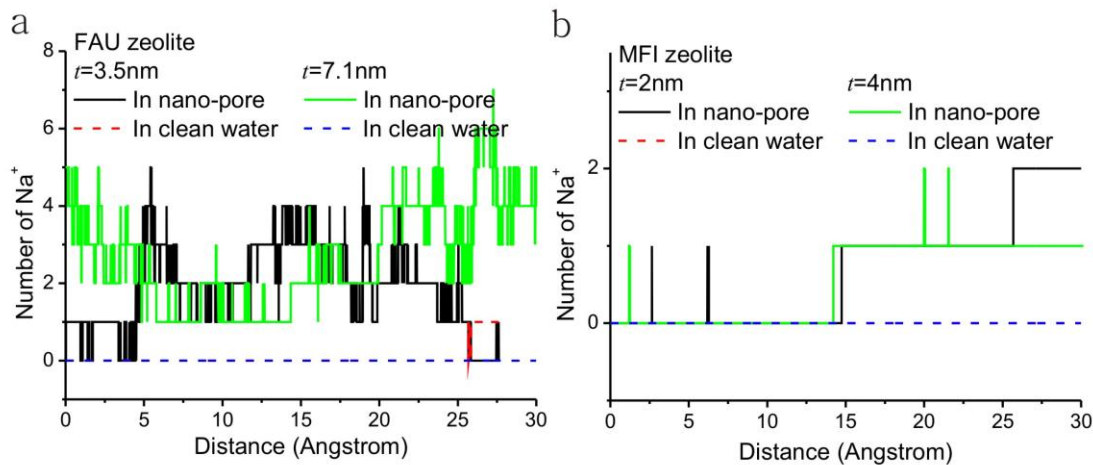

Figure 2 The sodium ions in nanopore and clean water region during compression for FAU zeolite (a) and MFI zeolite (b).

The relation between pressure drop and compressive distance of left piston for rigid and flexible membrane is given in Figure 3.

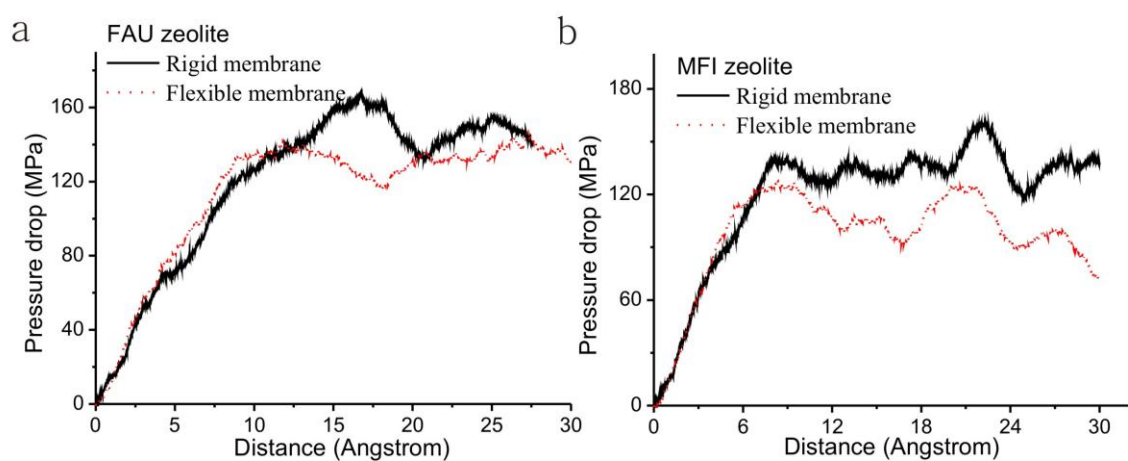

Figure 3 The pressure drop for FAU zeolite (a) and MFI zeolite (b).

The number of sodium ion during compression of left piston for rigid and flexible membrane is given in Figure 4.

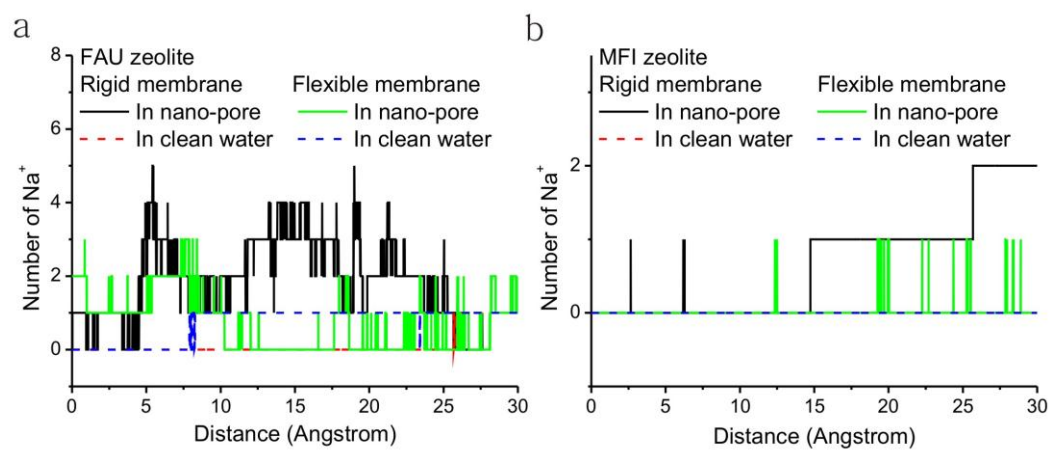

Figure 4 The sodium ions in nanopore and clean water region during compression for FAU zeolite (a) and MFI zeolite (b).
